# Supplementary material for: EXOSC5: A Novel Biomarker for Poor Prognosis in Lung Adenocarcinoma
Source: Research Square preprint supplement (doi:10.21203/rs.3.rs-5782899/v1), 2025-03-24
Supplement: Supplementary file 1 [file 06ee3415253231ee1c682842.docx]

| Characteristics | High | Low | *P* value |
| --- | --- | --- | --- |
| N | 250 | 250 |  |
| Gender, n (%) |  |  | 0.210 |
| Male | 124 (24.8%) | 110 (22%) |  |
| Female | 126 (25.2%) | 140 (28%) |  |
| Age, n (%) |  |  | 0.591 |
| ≤65 | 127 (25.4%) | 121 (24.2%) |  |
| ＞65 | 123 (24.6%) | 129 (25.8%) |  |
| Stage, n (%) |  |  | 0.176 |
| Stage I | 129 (26.1%) | 143 (28.9%) |  |
| Stage II | 55 (11.1%) | 62 (12.6%) |  |
| Stage III | 48 (9.7%) | 31 (6.3%) |  |
| Stage IV | 14 (2.8%) | 12 (2.4%) |  |
| N, n (%) |  |  | 0.007 |
| N0 | 148 (30.5%) | 179 (36.8%) |  |
| N1 | 53 (10.9%) | 37 (7.6%) |  |
| N2 | 43 (8.8%) | 26 (5.3%) |  |
| T, n (%) |  |  | 0.397 |
| T1 | 76 (15.3%) | 92 (18.5%) |  |
| T2 | 141 (28.4%) | 122 (24.5%) |  |
| T3 | 23 (4.6%) | 24 (4.8%) |  |
| T4 | 9 (1.8%) | 10 (2%) |  |
| EXOSC5, median (IQR) | 16.988 (14.483, 22.87) | 9.388 (7.5217, 11.163) | < 0.001 |
