# Supplementary material for: EXOSC5: A Novel Biomarker for Poor Prognosis in Lung Adenocarcinoma
Source: Research Square preprint supplement (doi:10.21203/rs.3.rs-5782899/v1), 2025-03-24
Supplement: Supplementary file 2 [file 6f936b7974ef11bca47805c6.docx]

| Characteristics | High | Low | *P* value |
| --- | --- | --- | --- |
| N | 90 | 104 |  |
| Smoke, n (%) |  |  | 0.099 |
| Yes | 11 (5.7%) | 22 (11.3%) |  |
| No | 79 (40.7%) | 82 (42.3%) |  |
| Gender, n (%) |  |  | 0.676 |
| Male | 58 (29.9%) | 64 (33%) |  |
| Female | 32 (16.5%) | 40 (20.6%) |  |
| Size, median (IQR) | 3.25 (2.85, 5) | 3.5 (2.875, 4.5) | 0.712 |
| Degree of differentiation, n (%) |  |  | 0.510 |
| Mid | 50 (28.2%) | 57 (32.2%) |  |
| Low | 22 (12.4%) | 21 (11.9%) |  |
| High | 10 (5.6%) | 17 (9.6%) |  |
| T, n (%) |  |  | 0.424 |
| T1 | 37 (19.1%) | 36 (18.6%) |  |
| T2 | 35 (18%) | 51 (26.3%) |  |
| T3 | 9 (4.6%) | 6 (3.1%) |  |
| T4 | 9 (4.6%) | 11 (5.7%) |  |
| N, n (%) |  |  | 0.430 |
| N0 | 34 (17.5%) | 46 (23.7%) |  |
| N1 | 28 (14.4%) | 34 (17.5%) |  |
| N2 | 28 (14.4%) | 24 (12.4%) |  |
| Stage, n (%) |  |  | 0.476 |
| Stage I | 28 (14.5%) | 41 (21.2%) |  |
| Stage II | 24 (12.4%) | 27 (14%) |  |
| Stage III | 37 (19.2%) | 36 (18.7%) |  |
| Pleural invasion, n (%) |  |  | 0.410 |
| No | 46 (30.9%) | 51 (34.2%) |  |
| Yes | 21 (14.1%) | 31 (20.8%) |  |
| ACT, n (%) |  |  | 0.901 |
| No | 33 (20.5%) | 42 (26.1%) |  |
| Yes | 37 (23%) | 49 (30.4%) |  |
| Age, n (%) |  |  | 0.033 |
| ＞65 | 42 (21.6%) | 33 (17%) |  |
| ≤65 | 48 (24.7%) | 71 (36.6%) |  |
