# Supplementary material for: EXOSC5: A Novel Biomarker for Poor Prognosis in Lung Adenocarcinoma
Source: Research Square preprint supplement (doi:10.21203/rs.3.rs-5782899/v1), 2025-03-24
Supplement: Supplementary file 3 [file 850c9abb8a7e5da52c05ce2c.docx]

| Metric | Value |
| --- | --- |
| Fleiss' Kappa | 0.731 |
| Z-value | 17.6 |
| P-value | < 2.22e-16 |
| Subjects | 194 |
| Raters | 3 |
