# Supplementary figures and images for: EXOSC5: A Novel Biomarker for Poor Prognosis in Lung Adenocarcinoma
Source: Research Square preprint supplement (doi:10.21203/rs.3.rs-5782899/v1), 2025-03-24

Observed fraction survival probability

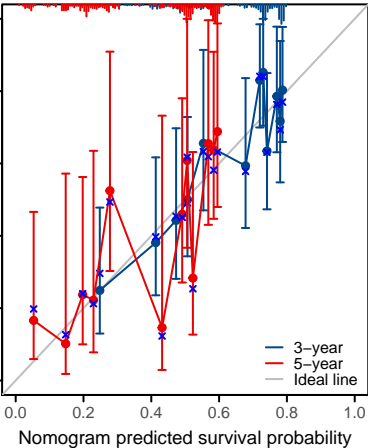

Supplement: Supplementary file 1 [file 13fd80c9d1b43b65d82b55f2.pdf]

Observed fraction survival probability

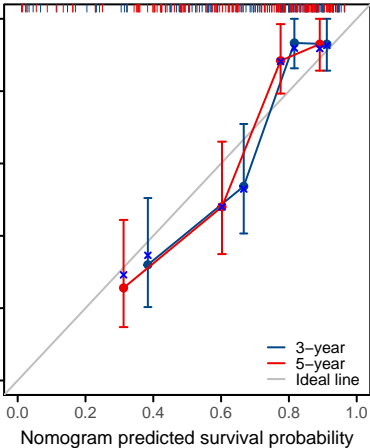

Supplement: Supplementary file 2 [file 26302b6dbe11203cb783c508.pdf]
